# Supplementary material
Source: Springer Nature journal article supplement (https://www.springermedizin.de/resource/supplementary/13058_2011_2934_MOESM11_ESM.pdf/9702912)

**A****FVB/N**IFN $\gamma$  spots/ $3 \times 10^5$  CD8 $^+$  cells

10 20 30 40 50

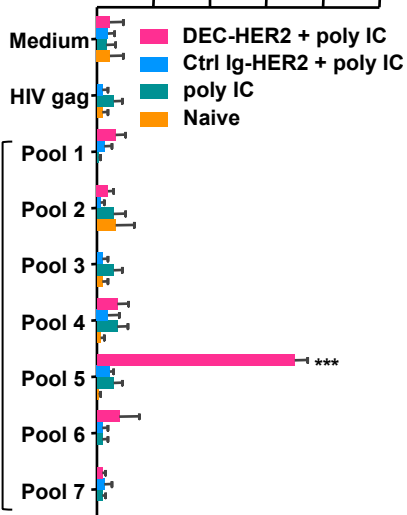**B****FVB/N**% IFN $\gamma^+$  proliferating CD8 $^+$  cells

2 4 6 8

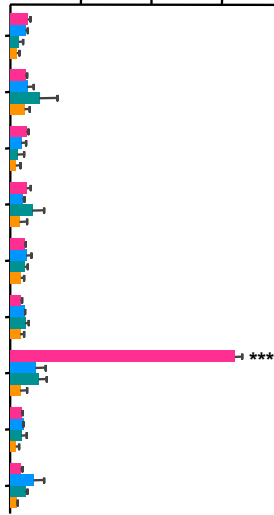**C****HLA-A2**IFN $\gamma$  spots/ $3 \times 10^5$  CD8 $^+$  cells

50 100 150

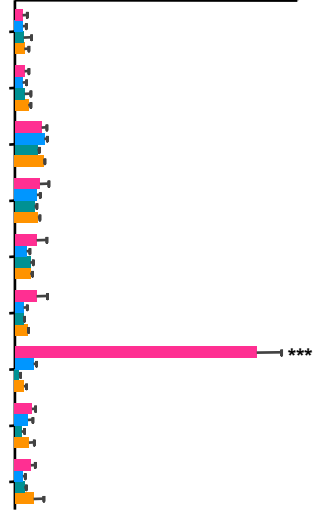

Supplement: MOESM11 [file 9702912]
